# Supplementary material for: Optimizing a Regional White Spruce Tree Improvement Program: SNP Genotyping for Enhanced Breeding Values, Genetic Diversity Assessment, and Estimation of Pollen Contamination
Source: MDPI journal article supplement (doi:10.3390/f14112212), 2023-11-08
Supplement: s1 [file s1]

Archive with 1 entries (1 files):
- forests-2647886-supplementary.pdf
